1 **A scanning electron microscopy-based screen of leaves of *Solanum pennellii* (ac. LA716) x *Solanum***  
2 ***lycopersicum* (cv. M82) introgression lines provides a resource for identification of loci involved in**  
3 **epidermal development in tomato.**

4 Galdon-Armero, J.<sup>1</sup>, Arce-Rodriguez, M. L.<sup>2</sup>, Martin, C.<sup>1</sup>

5 <sup>1</sup>Department of Metabolic Biology, John Innes Centre, Colney Lane, Norwich, UK

6 <sup>2</sup>Departamento de Ingeniería Genética, Centro de Investigación y de Estudios Avanzados del Instituto  
7 Politécnico Nacional, Unidad Irapuato, 36824 Irapuato, Guanajuato, Mexico

8 **Abstract**

9 The aerial epidermis of plants plays a major role in their environment interactions, and the  
10 development of its cellular components -trichomes, stomata and pavement cells- is still not fully  
11 understood. We have performed a detailed screen of the leaf epidermis of two generations of the  
12 well-established *Solanum pennellii* ac. LA716 x *Solanum lycopersicum* cv. M82 introgression line (IL)  
13 population using a combination of scanning electron microscopy techniques. Quantification of the  
14 trichome and stomatal densities in the ILs revealed 18 genomic regions with a low trichome density  
15 and 4 ILs with a high stomatal density. We also found ILs with abnormal proportions of different  
16 trichome types and aberrant trichome morphologies. This work has led to the identification of new,  
17 unexplored genomic regions with roles in trichome and stomatal formation and provides an  
18 important dataset for further studies on tomato epidermal development that is publically available  
19 to the research community.

20 **Introduction**

21 The epidermis is the external cell layer of plant organs and, in aerial tissues, consists of three types  
22 of specialised cells: trichomes (hairs), stomata and pavement cells. Trichomes are outgrowths  
23 (commonly referred to as hairs) which can have different sizes and shapes, and their morphology has  
24 been used commonly for taxonomic purposes (Payne, 1978). In *Solanum lycopersicum* (tomato) and  
25 related species, trichomes are multicellular and have been classified into seven different types  
26 according to size, morphology and metabolic profiles of those bearing glandular heads (Luckwill,  
27 1943, Simmons and Gurr, 2005). Stomata are pores surrounded by two specialised guard cells in  
28 which turgor is regulated to control gas exchange between the plant and the atmosphere  
29 (Hetherington and Woodward, 2003). Stomata, in contrast to trichomes, have conserved  
30 morphology and function in plants (Chater et al., 2017). Pavement cells are relatively unspecialised  
31 epidermal cells which ensure an adequate patterning of trichomes and stomata on the leaf surface.  
32 In tomato, pavement cells have a characteristic undulated shape, like pieces of a jig-saw puzzle, a

33 shape which is not uncommon in other dicotyledonous plants (Vófély et al., 2019). These different  
34 cell types emerge from a single cell layer, the protodermis, and therefore are developmentally  
35 linked, as suggested by studies in tobacco and tomato (Glover et al., 1998, Glover, 2000). The  
36 importance of correct spacing of epidermal cell types and the potentially limited size of the pool of  
37 protodermal cells implies cross-talk in the regulation of determination of different cell fates in the  
38 epidermis.

39 From a developmental point of view, most studies of trichome formation have focused on the model  
40 plant *Arabidopsis thaliana*, which produces only one type of unicellular, non-glandular trichome,  
41 contributing to the establishment of a detailed model for their initiation and development at the  
42 cellular and molecular levels (Pattanaik et al., 2014, Szymanski et al., 1998). The transcriptional  
43 regulation of trichome initiation in *A. thaliana* involves the formation of a MYB-BHLH-WD40 (MBW)  
44 complex which induces trichome formation. The main MYB transcription factor forming part of this  
45 complex is GLABROUS1 (GL1) (Larkin et al., 1994), although MYB23 and MYB82 can perform the  
46 same function redundantly (Kirik et al., 2005, Liang et al., 2014). Three BHLH factors can form part of  
47 this MBW complex, GLABRA3 (GL3) (Payne et al., 2000) and ENHANCER OF GLABRA3 (EGL3) (Zhang  
48 et al., 2003), and TRANSPARENT-TESTA8 (TT8) plays the same role in leaf margins (Maes et al., 2008).  
49 Additionally, a WD40 factor has been identified as part of the complex, TRANSPARENT TESTA  
50 GLABRA1 (TTG1) (Walker et al., 1999). This complex activates the expression of downstream genes  
51 necessary for trichome development. One such target is the WRKY transcription factor encoded by  
52 *TRANSPARENT TESTA GLABRA 2 (TTG2)*. TTG2 has been suggested to be recruited to the MBW  
53 complex itself through interaction with the WD40 protein TTG1 (Pesch et al., 2014; Lloyd et al.,  
54 2017). Alternatively, TTG1 and TTG2 may interact downstream of the MBW complex to narrow the  
55 target genes responding to its transcriptional regulation (Lloyd et al., 2017) Among other targets,  
56 *GLABRA2 (GL2)* encodes an HD-Zip transcription factor essential for the correct morphogenesis of  
57 the mature trichomes (Szymanski et al., 1998). Furthermore, the MBW complex can be activated by  
58 a hierarchical cascade of C2H2 zinc finger transcription factors, including GLABROUS INFLORESCENCE  
59 STEM proteins (GIS, GIS2 and GIS3) and ZINC FINGER PROTEIN 5, 6 and 8 (Gan et al., 2007, Sun et al.,  
60 2015, Zhou et al., 2011, Zhou et al., 2013, Gan et al., 2006). In contrast, negative regulation of  
61 trichome initiation involves the expression of small R3 MYB transcription factors in the trichome  
62 initial including TRYPTICON (TRY), CRAPICE (CPC), ENHANCER OF TRYPTICON AND CAPRICE1/2/3  
63 (ETC1/2/3) and TRICHOMLESS1/2 (TCL1/2). These R3 MYB proteins can move to neighbouring cells  
64 and compete with GL1 in the formation of the MBW complex (Wester et al., 2009, Wada et al., 1997,  
65 Schnittger et al., 1999, Kirik et al., 2004b, Kirik et al., 2004a). However, this model does not apply to

66 tobacco, tomato or related species (Serna and Martin, 2006), where trichome formation is  
67 controlled by different regulatory proteins (Lloyd et al., 2017).

68 In tomato, the focus of research has been on glandular trichomes and the metabolites they secrete  
69 (Schillmiller et al., 2008, McDowell et al., 2011). A number of different transcription factors involved  
70 in trichome formation have been identified. SIMX1 (a MIXTA transcription factor) was shown to  
71 control trichome initiation in tomato, while also regulating cuticle deposition and carotenoid content  
72 in fruit (Ewas et al., 2016). MIXTA transcription factors are known regulators of trichome initiation in  
73 several species such as *Artemisia annua* (Yan et al., 2018), cotton (Wu et al., 2018) or *Populus* (Plett  
74 et al., 2010). Moreover, two HD-ZIP transcription factors have been identified as regulators of  
75 trichome development in tomato, Woolly (Yang et al., 2011) and CUTIN DEFICIENT2 (CD2)  
76 (Nadakuduti et al., 2012). Woolly controls trichome initiation and specifically the morphogenesis of  
77 long, glandular type I trichomes (Yang et al., 2011) and does so by forming a complex with a small  
78 cyclin, SICycB2, which regulates the mitotic divisions in multicellular trichomes (Gao et al., 2017).  
79 CD2 regulates cuticle deposition and the formation of glandular type VI trichomes (Nadakuduti et al.,  
80 2012), and the development of this trichome type is also regulated by the basic helix-loop-helix  
81 transcription factor SIMYC1 (Xu et al., 2018). A C2H2 zinc finger transcription factor, HAIR, has been  
82 identified as a regulator of the formation of both type I and type VI trichomes and may control  
83 trichome initiation (Chang et al., 2018). Finally, the tomato homolog of TRYPTICHON (SITRY) is  
84 functionally equivalent to TRY when ectopically expressed in *A. thaliana*, but its native function in  
85 tomato remains uncharacterised (Tominaga-Wada et al., 2013). However, current understanding of  
86 the regulation of trichome initiation and development in tomato is much more limited than for  
87 *Arabidopsis*.

88 The use of wild tomato species as a source of genetic variation has resulted in the identification of  
89 important quantitative trait loci (QTLs) for many traits (Rick and Chetelat, 1995), and has been  
90 undertaken traditionally by screening of near-isogenic introgression lines (ILs), generated by  
91 successive backcrossing of the offspring of a cross between a wild relative species and a cultivated  
92 crop to the cultivated parent (Eshed and Zamir, 1995). The most widely used IL population in tomato  
93 is the *S. pennellii* ac. LA716 x *S. lycopersicum* cv. M82 IL population, which has been extensively  
94 curated and genotyped precisely (Chitwood et al., 2013). Comprehensive analyses of this IL  
95 population has led to the identification of loci of interest including tolerance to pathogens (Smart et  
96 al., 2007, Sharlach et al., 2013), abiotic stress (Frery et al., 2011, Rigano et al., 2014), primary  
97 metabolism (Magnum et al., 2018) and morphogenesis (Chitwood et al., 2013, Ron et al., 2013).  
98 With respect to trichomes, extensive work on characterising trichome secretion in the ILs has been  
99 undertaken, revealing QTLs involved in the synthesis of acyl sugars and terpenoids (Schillmiller et al.,

100 2010), and a visual assessment of trichome phenotypes in the IL population aided in the  
101 identification of HAIR as a regulator of trichome formation (Chang et al., 2018). However, the aerial  
102 epidermis of the ILs has not been characterised fully and we still lack detailed understanding of the  
103 degree of variability present in the population. Differences in trichome and stomatal densities and  
104 trichome types reported for *S. lycopersicum* and *S. pennellii* (Simmons and Gurr, 2005, McDowell et  
105 al., 2011, Heichel and Anagnostakis, 1978a) support the use of the *S. pennellii* ac. LA716 x *S.*  
106 *lycopersicum* cv. M82 ILs as a platform for investigating trichome development in tomato.

107 We have performed a comprehensive analysis of the leaf epidermis of two generations of the *S.*  
108 *pennellii* ac. LA716 x *S. lycopersicum* cv. M82 introgression lines (ILs) by a combination of Scanning  
109 Electron Microscopy (SEM) techniques. The outputs of this study constitute an important resource  
110 for further research into cellular development and led to the identification of unexplored genomic  
111 regions associated to the determination of stomatal and trichome density in leaves, as well as  
112 trichome morphogenesis.

## 113 **Results**

### 114 **-Identification of genomic regions involved in the determination of leaf trichome density.**

115 We evaluated the adaxial leaf epidermis of fully expanded first true leaves of the IL population over  
116 two generations, and we identified specific ILs consistently showing differences for specific  
117 parameters over the two generations. We measured trichome density in the parental lines *S.*  
118 *lycopersicum* cv. M82 and *S. pennellii* ac. LA716 (Fig 1A) as well as the ILs over two generations (Fig.  
119 1B and S1). Seedlings were grown for 3-4 weeks until the first true leaves were fully expanded. For  
120 each leaf sample 8-15 micrographs of the adaxial epidermis of the same area of a leaflet of the one  
121 of the first true leaves were prepared. Three to four seedlings were scanned for each IL in each  
122 generation.

123 We measured the trichome and stomatal density of *S. pennellii* ac. LA716 and *S. lycopersicum* cv.  
124 M82 parents on the adaxial surface of leaves and found it was three-fold higher in *S. pennellii* ac.  
125 LA716 compared to *S. lycopersicum* cv. M82 (Fig. 1A and 2A). This is in agreement with previous  
126 reports on trichomes in *Solanum* species (Simmons and Gurr, 2005) but contrasts with previous  
127 reports of stomatal density in *S. pennellii*, where stomatal density in *S. pennellii* was reported to be  
128 lower than in *S. lycopersicum* (Chitwood et al., 2013, Heichel and Anagnostakis, 1978b). These  
129 differences supported the use of *S. pennellii* as a donor species to study epidermal development in  
130 *Solanum*.

131 We observed 19 ILs with low trichome density over the two generations: specifically ILs 2-1-1, 2-2  
132 and 2-3 on chromosome 2; IL 4-1 in chromosome 4; ILs 5-3 and 5-4 on chromosome 5, IL 7-2 on  
133 chromosome 7; ILs 8-1, 8-1-1 and 8-2-1 on chromosome 8; ILs 9-1-3, 9-3-1 and 9-3-2 on  
134 chromosome 9; ILs 10-1 and 10-3 on chromosome 10; ILs 11-2 on chromosome 11; and ILs 12-1, 12-3  
135 and 12-3-1 on chromosome 12. IL 11-3 had a significantly higher trichome density only in the first  
136 generation, but in the second generation, although not significantly different from M82, it averaged  
137 the highest value for trichome density.

#### 138 **-Identification of genomic regions involved in the determination of leaf stomatal density.**

139 We measured the stomatal density of the parental lines *S. lycopersicum* cv. M82 and *S. pennellii* ac.  
140 LA716 (Fig 2A) and over two generations of the IL population (Fig. 2B and S2). We identified four ILs  
141 with high stomatal density. These were: IL 5-1 on chromosome 5; ILs 7-2 and 7-5 on chromosome 7  
142 and IL 8-3-1 on chromosome 8. No IL showed consistently lower stomatal density than M82.

#### 143 **-Identification of genomic regions involved in the determination of trichome types.**

144 We classified trichomes according to the categories established by Luckwill et al., (1943) over two  
145 generations. Trichomes were extensively damaged by the use of chemical fixation and critical point  
146 drying of the samples from the first generation (Fig. S3), and therefore we focused our analysis on  
147 the data from the second generation (Fig. 3). In M82, the main trichome type is type I/IV, accounting  
148 for 63% of the total. The other types of trichome found in *S. lycopersicum* were observed in smaller  
149 percentages (5-10%). We used the distribution in M82 as a standard for comparison with the rest of  
150 the ILs. For most lines, type I/IV trichomes were the most abundant, although ILs 2-1, 3-3, 4-3-2, 8-1-  
151 1 and 8-2-1 showed substantial reductions in this type of trichome. This reduction in type I/IV  
152 trichomes was compensated by an increase in non-glandular type V trichomes in ILs 2-1 and 3-3. For  
153 21 of the ILs, we did not observe any type V trichomes on the adaxial surface of the first true leaf.  
154 Type VI trichomes were generally observed at low frequency, but type VI trichomes were the most  
155 common type in IL 8-1-1, 8-2-1 and 8-3-1. A total of 6 ILs, ILs 2-4, 2-6-5, 4-1, 4-1-1, 5-5 and 9-3  
156 showed no type VI trichomes in the assessed tissue. Type VII trichomes were the rarest and absent  
157 on the first true leaves of 31 of the ILs. Importantly however, the absence of any one type of  
158 trichome from the adaxial epidermis of the first true leaf does not imply a complete absence of this  
159 trichome type in other tissues.

#### 160 **-Identification of genomic regions involved in trichome morphogenesis and spatial patterning.**

161 For each line under study, trichomes showing aberrant morphology were recorded (Fig. 4 and S4).  
162 The most common type of aberrant trichome found in the population consisted of two swollen cells  
163 emerging from a type I-like multicellular base. This type of trichome was observed in ILs 4-3-2, 5-3,

164 6-4, 7-5, 8-1-2 and 11-3 (Fig. 4B-G). Trichomes with aberrant division patterns were also found in ILs  
165 1-1-2, 5-1 and 7-4-1 (Fig. S4A-C). In IL 10-2, we observed another type of aberrant trichome,  
166 consisting of branched, multicellular, non-glandular trichomes (Fig. S4D). In every IL with aberrant  
167 trichomes, the aberrant forms always appeared alongside wild type trichomes of the same type in  
168 both generations (Fig. 3 and S3).

169 Finally, we observed unusual clusters of trichomes on the adaxial surface of leaves in ILs 2-5 and 2-6  
170 (Fig. 5). In young leaves, trichomes in M82 are equally distributed on the leaf surface and they are  
171 oriented in the same direction (Fig. 5A). However, in IL 2-5 trichomes were clustered in groups of up  
172 to 4 trichomes and they were randomly oriented (Fig. 5B). In mature, fully expanded leaves, we  
173 could still observe clusters of two trichomes in ILs 2-5 and 2-6, and these observations were made  
174 for glandular and non-glandular trichomes (Fig. 5). Trichomes in these clusters were found oriented  
175 in all possible directions respectively to each other.

## 176 Discussion

### 177 -Natural variation in epidermal development in the *S. lycopersicum* cv. M82 x *S. pennellii* ac. LA716 178 ILs

179 Through comparison to *S. pennellii* ac. LA716 and to *S. lycopersicum* cv. M82 (Fig. 1A and 2A) we  
180 identified 18 ILs that showed consistent phenotypes over two generations, suggesting stable genetic  
181 components regulating trichome density in these ILs. Interestingly, most of the ILs analysed showed  
182 lower trichome density than M82, and these differences were consistent in both generations of the  
183 IL population (Fig. 1B and S1B). This was unexpected given the values observed for the parents (Fig.  
184 1A). However, the complexity of trichome development, which involves cell wall expansion, cell  
185 division and differentiation (Glover, 2000) and the negative and positive control exerted by different  
186 regulatory factors (Tian et al., 2017) could well be impaired by small changes in the activity or  
187 expression of genes introgressed in the ILs. Some known genes involved in trichome development  
188 map to the genomic regions corresponding to the 18 ILs of interest. An aquaporin-like gene  
189 (Solyc08g066840) has been proposed as a candidate gene for the *dialytic* (*dl*) mutant phenotype  
190 (Chang et al., 2016), which maps to the IL 8-2-1 region. However, this mutant was not compromised  
191 in trichome initiation but rather in trichome development, displaying aberrant, forked trichomes on  
192 its leaf surface. The auxin-responsive factor 3 (SIARF3) plays an important role in the development of  
193 epidermis in tomato, and when silenced, trichome density was reduced (Zhang et al., 2015). SIARF3  
194 maps to the region covered by IL 2-3. The HD-Zip transcription factor responsible for the *Woolly*  
195 (Solyc02g080260) mutant phenotype, with increased trichome density (Yang et al., 2011), also maps  
196 to the IL 2-3 region of chromosome 2. These genes are potential candidates for determining the

197 phenotype observed in this line (Fig. 1 and S1). The Woolly transcription factor interacts with a type-  
198 B cyclin (SlCycB2, Solyc10g083140), essential for division of multicellular trichomes, which causes a  
199 dramatic reduction in trichome density when silenced in RNAi lines (Gao et al., 2017). This gene  
200 maps to the region covered by IL 10-3, and might also be responsible for the low trichome density in  
201 this line. Further analysis of these ILs will be necessary to determine whether other factors might be  
202 involved in the determination of trichome density.

203 We assessed trichomes on the adaxial surface of the first true leaf of two generations of the ILs,  
204 using chemical fixation coupled with room temperature SEM for the first generation (Fig. S3) and  
205 cryo-scanning electron microscopy (SEM) for the second generation (Fig. 3). Trichomes were  
206 classified according to (Luckwill, 1943), although we grouped type I and type IV in the same group  
207 based on their similar morphology and metabolic profiles as proposed by (McDowell et al., 2011). In  
208 a similar fashion, non-glandular trichomes are traditionally classified as type II, III or V depending on  
209 their length, but for comparative purposes we classified them all as type V (Fig. 3 and S3). The most  
210 abundant trichome type in M82 and most ILs was type I/IV (Fig. 3, in contrast to previous reports,  
211 that ranked type VI trichomes as the most common glandular trichomes (Bergau et al., 2015).  
212 However, the density of type I trichomes has been reported to be a juvenility trait, being very high in  
213 the first leaf – the leaf we assessed (Fig. 3 and S3) (Vendemiatti et al., 2017). We observed five lines  
214 with a low proportion of type I trichomes (Fig. 3). In the case of ILs 2-1 and 3-3, this was  
215 compensated by an increase in the percentage of type V trichomes, in contrast to the observations  
216 in Vendemiatti et al. (2017), making these good candidate lines for further research into the control  
217 of the juvenile phase in vegetative development of tomato. In the case of ILs 8-1-1 and 8-2-1, the  
218 observed reduction in type I trichomes was accompanied by a reduction in trichome density (Fig. 1  
219 and 3). This suggests that the pathway controlling the formation of type I trichomes may be  
220 compromised in these lines, while other types of trichome might not be affected. Both lines also  
221 showed an increased proportion of type VI trichomes. This could indicate that different types of  
222 trichome are controlled by different regulatory mechanisms and that these mechanisms might be  
223 interlinked to compensate for alterations in the distribution between trichome types, in agreement  
224 with previous reports in tomato (Li et al., 2004, Yang et al., 2011) and tobacco (Payne et al., 1999).

225 Type VI trichomes were relatively un abundant in the sampled leaves, but absent only in 6 ILs of the  
226 population. IL 4-1 had no type VI trichomes, and this line also had low overall trichome density (Fig.  
227 1 and 3). Similar to the ILs on chromosome 8, this low trichome density could be due to a specific  
228 reduction in type VI trichomes. However it is important to note that, although we could not find type  
229 VI trichomes on the adaxial surface of the first true leaves, they were found on stems and major  
230 veins, suggesting that IL 4-1 influences tissue-specific regulation of epidermal development, which

231 has been reported in other species such as *A. thaliana* (Schnittger et al., 1998) or *Antirrhinum majus*  
232 (Glover et al., 1998). Type VII trichomes were rare in the interveinal leaf tissue of all lines, resulting  
233 in our finding none in almost half of the lines (Fig. 3). This type of trichome was, however, commonly  
234 found on major and minor veins, indicating that their number is higher in epidermis overlying  
235 vascular tissues.

236 We found several ILs with aberrant trichome morphologies (Fig. 4 and S4) and unusual epidermal  
237 patterning (Fig. 5). The most common aberrant morphology consisted of a multicellular base similar  
238 to that found in type I trichomes, with two swollen cells emerging from this base (Fig. 4). These  
239 structures are reminiscent of the aberrant type I trichomes observed in the *odourless-2* mutant  
240 (Kang et al., 2010) and the *dialytic* mutant (Chang et al., 2016). The swollen appearance of these  
241 trichomes is similar to that observed in the *hairless* mutant (Kang et al., 2016), which presents a  
242 truncated version of the *SPECIALLY-RAC1 ASSOCIATED (SRA1)* gene and is consequently  
243 compromised in the organisation of the actin cytoskeleton in trichomes, or the *inquieta* mutant,  
244 which harbours an altered copy of the *ACTIN-RELATED PROTEIN 2/3 COMPLEX SUBUNIT 2A*  
245 (*ARPC2A*) (Jeong et al., 2017). It is possible that the observed phenotype might be due to alterations  
246 in the process of cell elongation or cytoskeleton development in trichomes. In fact, the *ARPC2A* gene  
247 maps to the IL 11-3 region of tomato (Fig. 4G). The *ACTIN-RELATED PROTEIN 3 (ARP3)* and *ACTIN-*  
248 *RELATED PROTEIN 2/3 COMPLEX SUBUNIT 3 (ARPC3)* genes encode proteins that are part of the  
249 complex required for actin filament formation (Goley and Welch, 2006), and map to the IL 4-3-2 and  
250 IL 7-5 regions respectively (Fig. 4B and E). All of these aberrant trichomes appear amid wild-type  
251 looking trichomes (Fig. 3 and S3) pointing towards phenotypes caused by small changes in  
252 expression or functionality of *S. pennellii* alleles of the genes rather than gain- or loss-of-function  
253 differences between the two species. We also observed branched, multicellular, non-glandular  
254 trichomes in IL 10-2 which lacked a multicellular base (Fig. S4D). This structure resembles the type V-  
255 like trichomes observed in SICycB2 or Woolly RNAi lines (Yang et al., 2011). In fact, SICycB2 maps to  
256 the region delimited by this IL, indicating that the *S. pennellii* allele of the gene might have reduced  
257 activity compared to the alleles in M82. Finally, we observed an unusual clustering of trichomes in  
258 ILs 2-5 and 2-6 (Fig. 5). Trichomes are evenly distributed over the leaf surface in tomato (Fig. 5A),  
259 although the mechanisms by which this patterning is determined are unclear. In *A. thaliana*,  
260 trichome patterning is mediated by small MYB transcription factors that inhibit trichome initiation in  
261 cells adjacent to newly formed trichomes (Hauser, 2014), but the mechanism in tomato and related  
262 species is not yet understood (Tominaga-Wada et al., 2013). These ILs provide useful tools to gain  
263 new insights into cell fate determination in the epidermis of tomato leaves.



264 We also measured the stomatal density for each line in both generations of the ILs (Fig. 2 and S2).  
265 We identified 4 ILs with a consistently high stomatal density in both generations. Interestingly, most  
266 of the ILs showed a higher stomatal density than the parental line M82 (Fig. 2 and S2). In previous  
267 studies a lower stomatal density in *S. pennellii* compared to *S. lycopersicum* has been reported  
268 (Heichel and Anagnostakis, 1978, Chitwood et al., 2013), although our study showed a stomatal  
269 density significantly higher in *S. pennellii* than in the cultivated parent (Fig. 2A). These differences  
270 were the opposite to those observed for trichomes, where most ILs had a lower trichome density  
271 than M82 (Fig. 1 and S1). These observations suggested a possible developmental link between the  
272 two epidermal structures, perhaps involving an early commitment of cell fate to trichome formation  
273 that prevents stomatal formation thereafter as described for tobacco (Glover et al., 1998) and  
274 tomato under drought conditions (Galdon-Armero et al., 2018). We analysed the genomic regions  
275 covered by the 4 ILs with consistent high stomatal density to determine if any known regulators of  
276 stomatal development (Pillitteri and Dong, 2013) mapped to them. We could not identify any known  
277 regulatory genes in these introgressed regions, suggesting that novel genes involved in the  
278 determination of stomatal density might be responsible for the observed phenotypes.

## 279 **Methods**

### 280 **Plant material**

281 We grew two generations of the *S. pennellii* ac. LA716 x *S. lycopersicum* cv. M82 introgression lines  
282 (ILs) (Eshed and Zamir, 1995) to assess epidermal cells on the adaxial leaf epidermis. The first  
283 generation consisted of 74 ILs grown under the same conditions, but all seeds were sown  
284 simultaneously in October 2016. The second generation consisted of 67 ILs, which were grown under  
285 greenhouse condition at the John Innes Centre, with an average temperature of 20-22 °C. These  
286 lines were grown successively from October 2015 to February 2016, with approximately 6 ILs  
287 phenotyped per week. For both generations, plants were grown for 4-weeks, until the first true leaf  
288 was fully expanded. For each line, 3-4 plants in each generation were phenotyped.

### 289 **Scanning Electron Microscopy**

290 Trichome phenotypes were assessed using a Zeiss Supra 55 VP SEM (Zeiss, Germany). Two different  
291 ways of sample fixation were used to preserve the structure of trichomes and other epidermal  
292 structures. For cryo-fixation, plant samples were glued to a cryo-stage and then submerged in liquid  
293 nitrogen in a vacuum-generating environment to reduce frosting of water vapour. The samples were  
294 then introduced in the microscope preparation chamber, where any frost was removed by  
295 sublimation at -95 °C for 3.5 min. The samples were then sputter-coated with platinum for 150 s and

296 transferred to the main microscope chamber, at -125 °C. Imaging took place in the main chamber,  
297 where the electron beam was active, and the secondary and back-scattered electrons could be  
298 perceived by the detectors. This fixation protocol is destructive, and samples cannot be stored for  
299 further imaging, but ensures integrity of most trichomes. Cryo-fixation was used to screen the  
300 second generation of ILs.

301 Chemical fixation was used to screen the first generation of ILs. Chemical fixation of the samples was  
302 achieved by vacuum infiltrating them with a glutaraldehyde 2.5% cacodylate solution and  
303 dehydrated through an ethanol series. Samples were dried in a Leica CPD300 critical-point dryer  
304 (Leica Microsystems, Germany), where water was replaced by liquid CO<sub>2</sub> and then evaporated at the  
305 critical point for CO<sub>2</sub>, removing all the liquid without damaging the structures of the sample. Dried  
306 samples were glued to a SEM stub and gold-coated before imaging in the main chamber of the  
307 microscope, at high vacuum and room temperature conditions.

### 308 **Quantification of epidermal structures**

309 For each leaf sample, 8-15 micrographs of 0.3 mm<sup>2</sup> were generated. In every case, the same leaf  
310 (first fully expanded leaf) and the same part of each leaflet (intervein space close to the central vein)  
311 was used for assessment of stomatal, trichome and pavement cell numbers. These three cell types  
312 were manually quantified in micrographs at a relatively low magnification (x600) using ImageJ v. 1.49  
313 (National Institutes of Health, USA). Trichome and stomatal densities were calculated as percentage  
314 of total epidermal cells and expressed as fold change of each line with respect to the M82 values  
315 obtained in the corresponding generation. Trichomes were classified in different groups according to  
316 Luckwill (1943), except that type I and type IV trichomes were grouped together under type I  
317 (McDowell et al., 2011) and all non-glandular trichomes were classified as type V. For trichome  
318 density values, all trichomes were considered together. Trichome-to-stomata ratios were calculated  
319 by dividing trichome density by stomatal density. Aberrant trichome morphologies were recorded  
320 and SEM pictures were taken at the most appropriate magnification. All micrographs used in this  
321 study are available in the BioStudies database (<http://www.ebi.ac.uk/biostudies>) (McEntyre et al.,  
322 2015) under accession number S-BSST262.

### 323 **Statistical analysis**

324 To assess differences in trichome and stomatal density in the IL population, we performed t-tests to  
325 compare the value of each individual line to the value of M82 for the corresponding generation. For  
326 the first generation, where values were more consistent, a p-value cut-off of 0.05 was used. For the  
327 second generation, where cell density values were more extreme and variable, a p-value cut-off of

328 0.005 was used. For the trichome type distributions, we made qualitative observations without  
329 determining significance. The analyses were performed using R software (ver. 3.2.2; R Core Team,  
330 Vienna, Austria).

331

332 **Acknowledgements:**

333

334 We acknowledge the financial support of a Rotation Studentship from the John Innes Foundation for  
335 JGA, the Institute Strategic Programs: Understanding and Exploiting Plant and Microbial Secondary  
336 Metabolism (BB/J004596/1) and Molecules from Nature (BB/P012523/1) from the UK Biotechnology  
337 and Biological Sciences Research Council (BBSRC) to JIC.

338

339

340

341

342

343

344

345

346

347

348

349

350

351

352

353

354

355

356

357

358

359

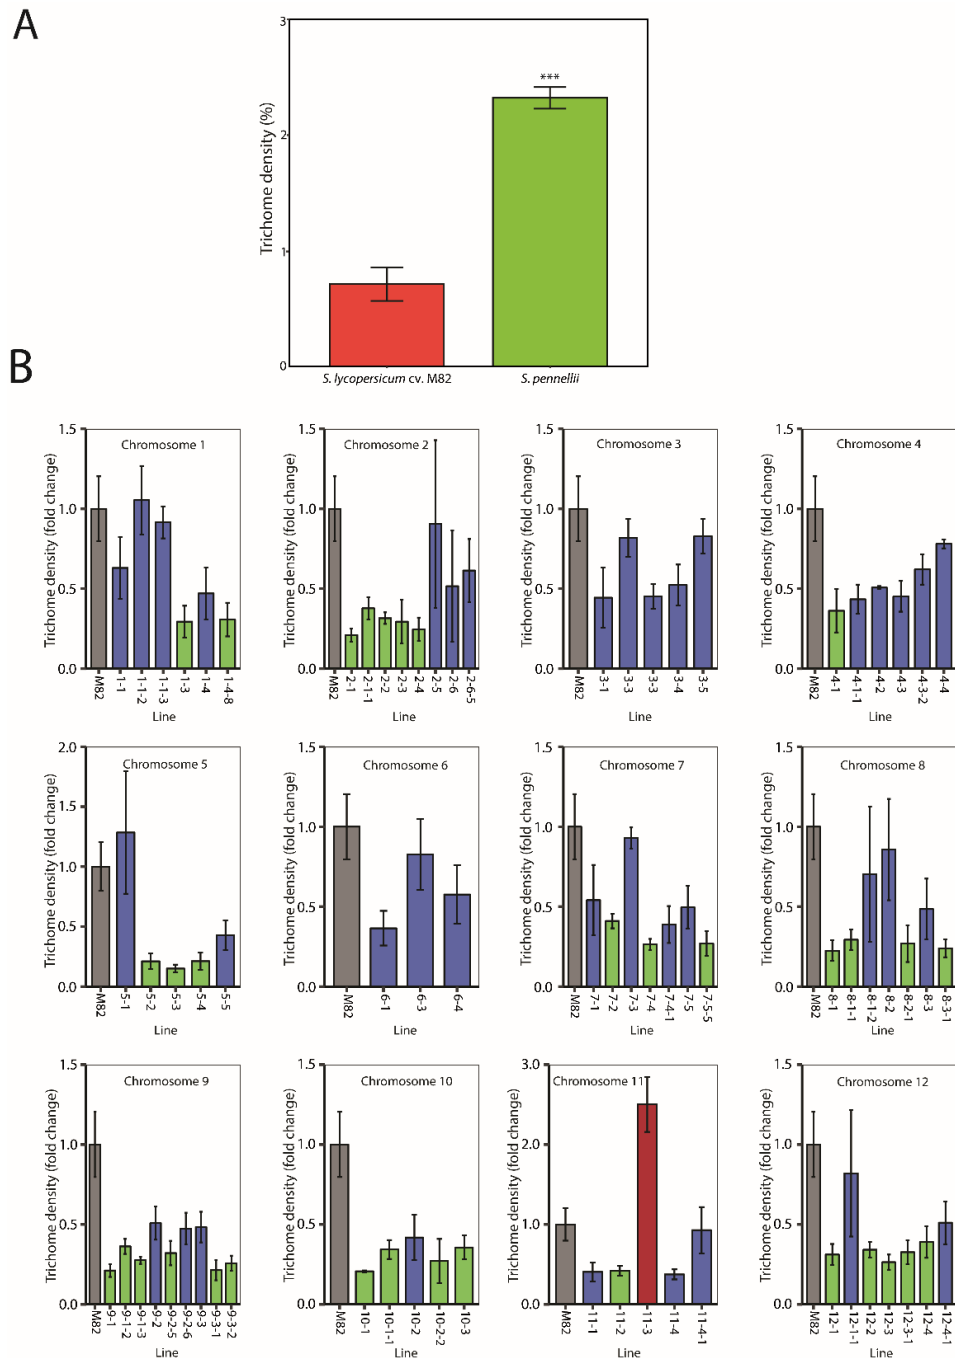

360

361 **Figure 1. Trichome densities of the *S. pennellii* (ac. LA716) x *S. lycopersicum* (cv. M82) ILs.**

362 **A)** Trichome density of the first fully expanded true leaf of *S. lycopersicum* cv. M82 (red bar)  
 363 and *S. pennellii* ac. LA716 (green bar). Values are expressed as mean  $\pm$  SEM (n=3). Stars  
 364 indicate significant differences (p-value<0.01) according to t-tests. **B)** Trichome density of  
 365 the first generation of ILs, grouped according to the chromosomal location of the  
 366 introgressed *S. pennellii* genomic region. Values are mean  $\pm$  SEM (n=3-4) of the relative value  
 367 of trichome density compared to M82 values (grey bar). Significant differences were  
 368 determined using t-tests between the value for each IL and the value for M82. Green bars  
 369 indicate ILs with significantly lower trichome densities than M82 (p-value<0.05) and red bars  
 370 indicate ILs with significantly higher trichome densities than M82 (p-value<0.05). Blue bars  
 371 indicate other ILs.

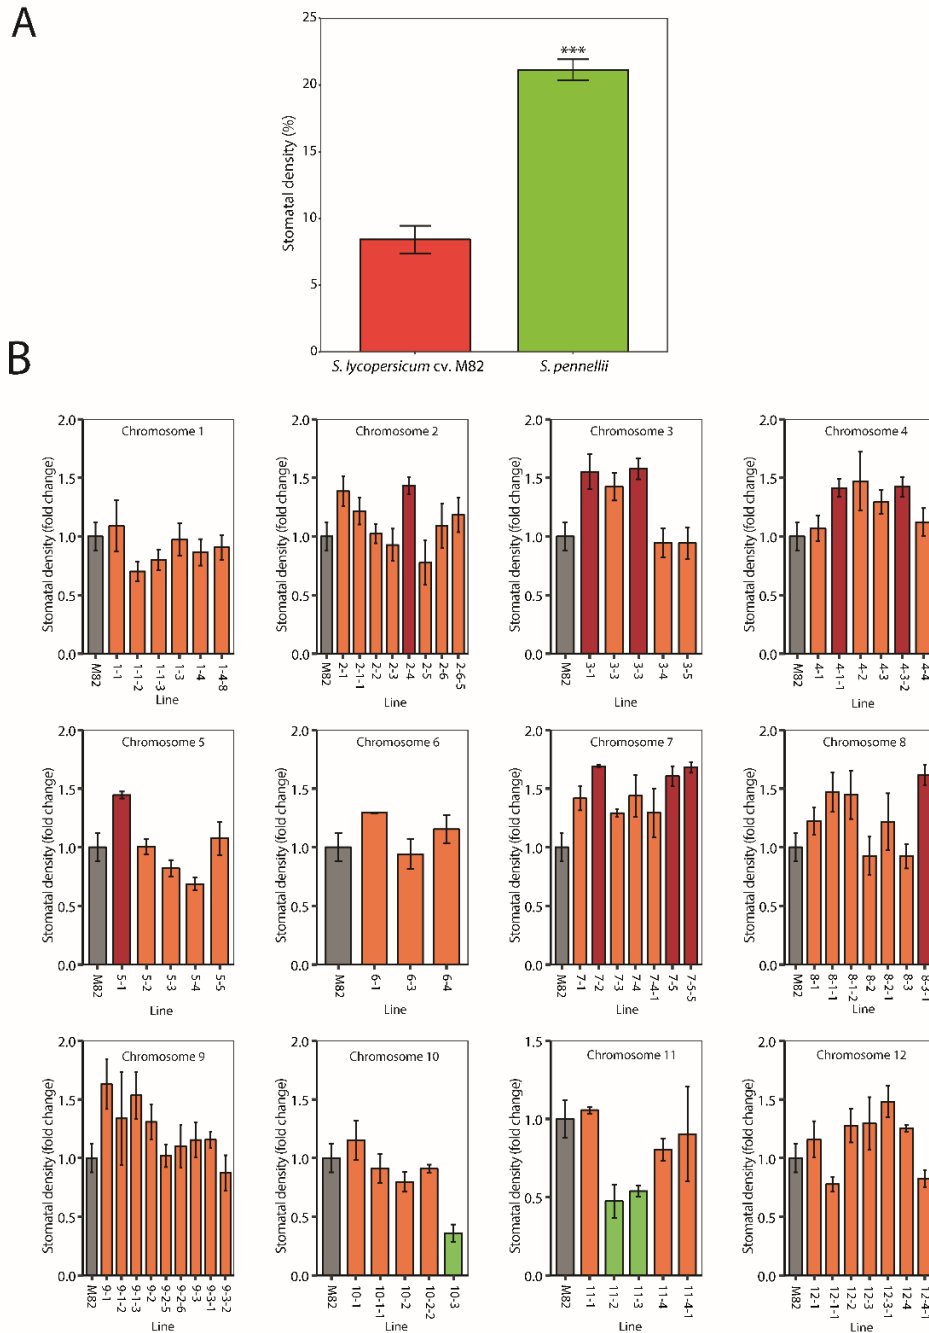

372

373 **Figure 2. Stomatal density of the *S. pennellii* (ac. LA716) x *S. lycopersicum* (cv. M82) ILs.**

374 **A)** Stomatal density of the first fully expanded true leaf of *S. lycopersicum* cv. M82 (red bar) and  
 375 *S. pennellii* ac. LA716 (green bar). Values are expressed as mean  $\pm$  SEM (n=3). Stars indicate  
 376 significant differences (p-value<0.01) according to a t-test.

377 **B)** Stomatal density of the first generation of ILs, grouped according to the chromosomal  
 378 location of the introgressed *S. pennellii* genomic region. Values show the mean  $\pm$  SEM (n=3-  
 379 4) of the relative value of stomatal density compared to M82 values (grey bar). Significant  
 380 differences were determined using t-tests between the value for each IL and the value for  
 381 M82. Green bars indicate ILs with a significantly lower stomatal density than M82 (p-  
 382 value<0.05) and red bars indicate ILs with a significantly higher stomatal density than M82  
 383 (p-value<0.05). Orange bars indicate any other ILs.

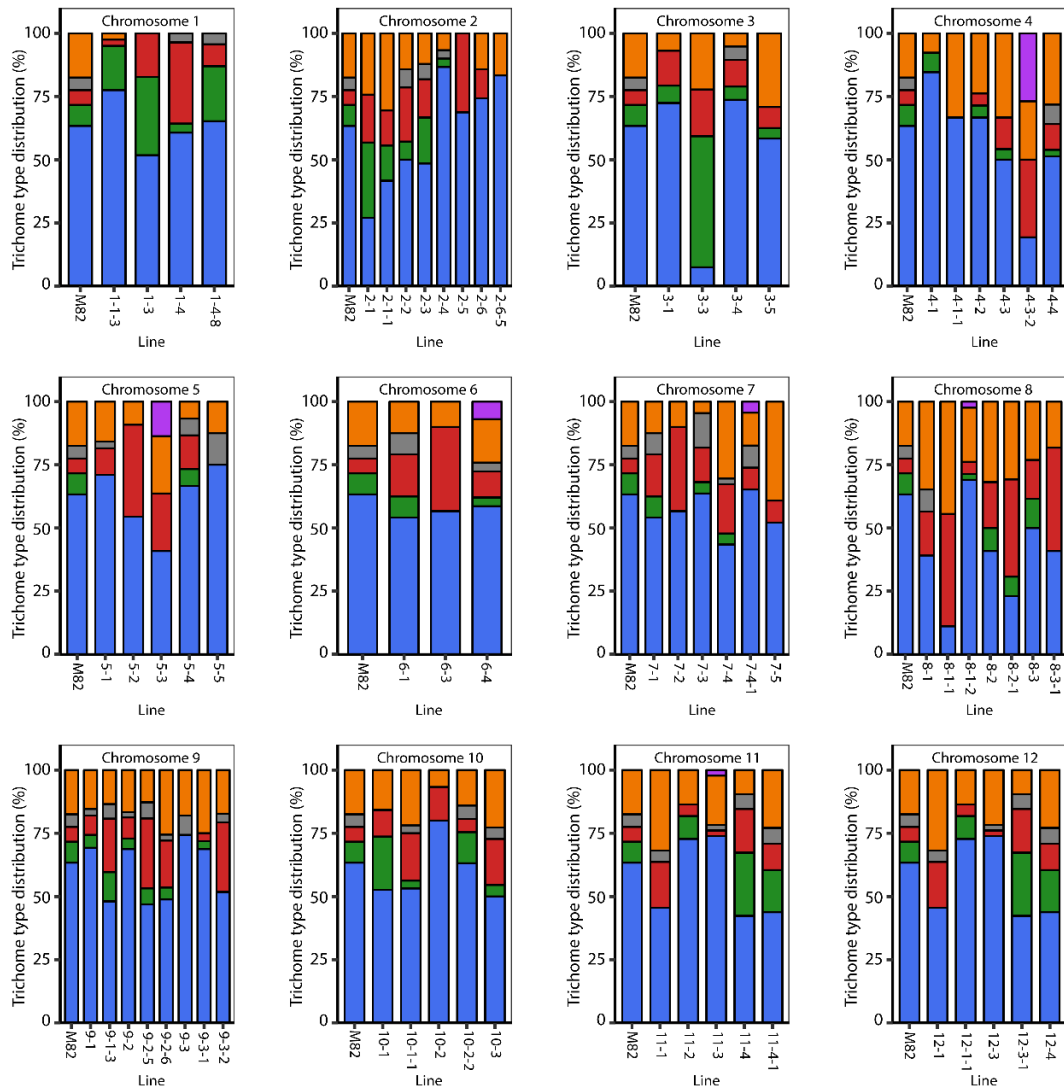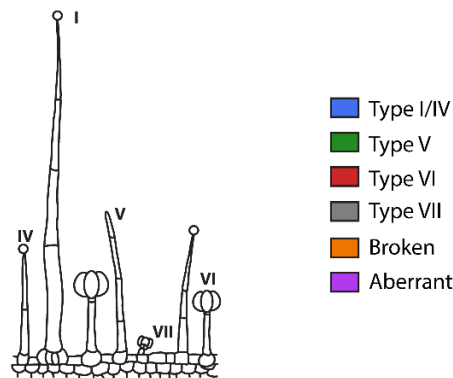

384

385 **Figure 3. Trichome type distribution of the *S. pennellii* (ac. LA716) x *S. lycopersicum* (cv. M82) ILs.**  
 386 Lines are classified according to the chromosomal region introgressed from *S. pennellii* and each bar  
 387 represents an IL, and the height of each colour section represents the proportion in percentage of  
 388 each type of trichome. Blue represents type I/IV trichomes; green represents type V trichomes; red  
 389 represents type VI trichomes; grey represents type VII trichomes, orange represents damaged  
 390 trichomes and purple represents aberrant trichomes. A schematic representation of each type of  
 391 trichome is displayed in the legend. Trichomes are classified in different types according to (Luckwill,  
 392 1943).

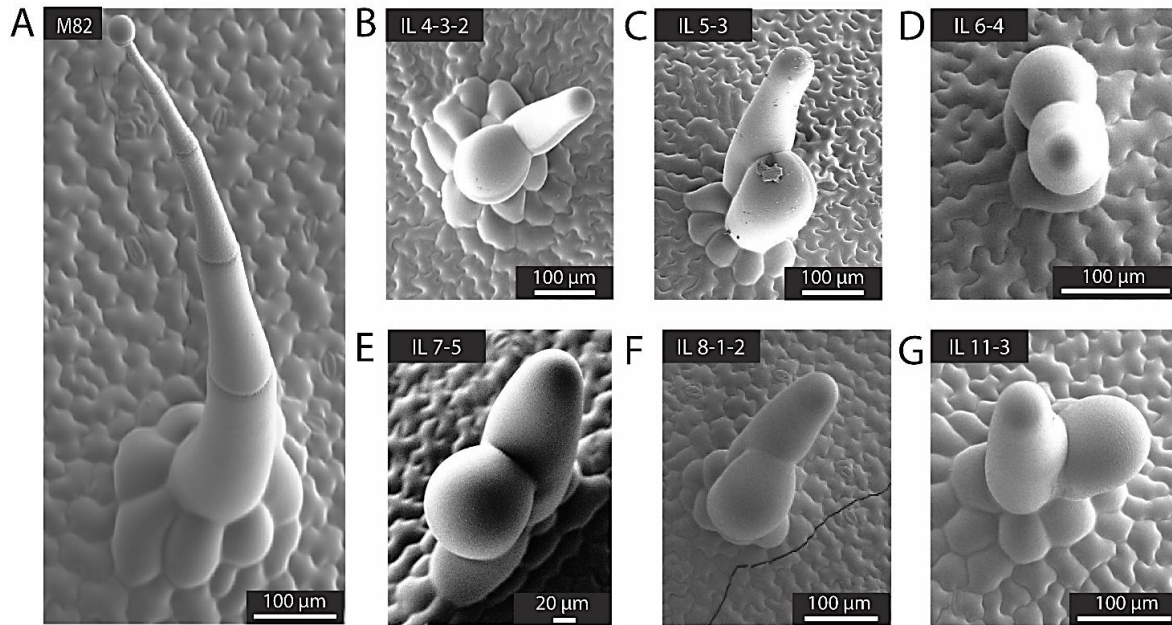

393

394 **Figure 4. Aberrant trichome morphologies in the IL population.** A) SEM micrograph of a  
395 representative type I trichome on the leaf surface of M82. Micrographs of representative aberrant  
396 trichomes are shown for ILs B) 4-3-2, C) 5-3, D) 6-4, E) 7-5, F) 8-1-2, G) 11-3, all sharing a similar  
397 swollen and forked appearance. Scale bars are shown in each micrograph.

398

399

400

401

402

403

404

405

406

407

408

409

410

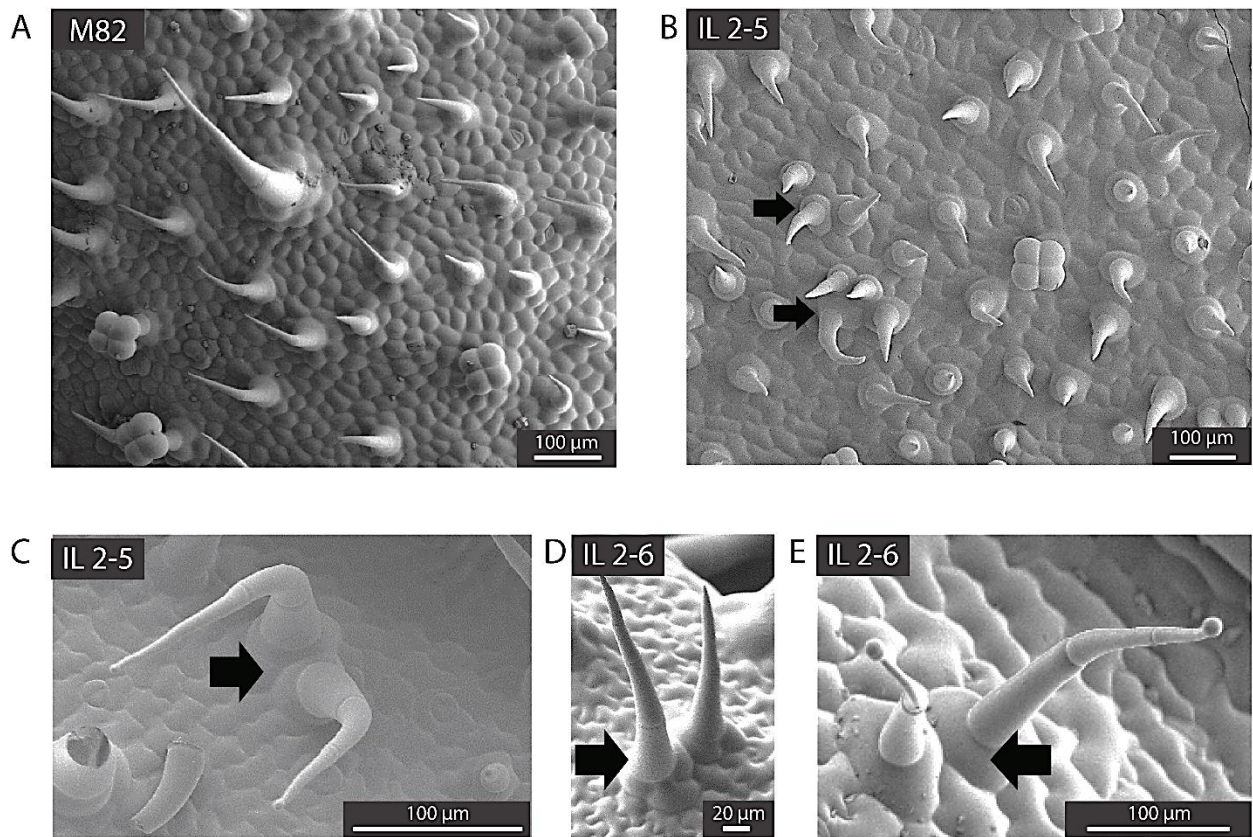

411

412 **Figure 5.**

413 **Abnormal trichome clusters in the IL population.**

414 **A)** SEM micrograph of the adaxial surface of a young leaf of M82. **B)** SEM micrograph of the adaxial

415 surface of a young leaf of IL 2-5. **C)** SEM micrograph of a cluster of two type IV trichomes in IL 2-5. **D)**

416 SEM micrograph of a cluster of two type V trichomes in IL 2-6. **E)** SEM micrograph of a cluster of two

417 type IV trichomes in IL 2-6. Scale bars are shown for each micrograph. Black arrows indicate clusters

418 of trichomes.

419

420



421 **REFERENCES:**

422

423 CHANG, J., YU, T., GAO, S., XIONG, C., XIE, Q., LI, H., YE, Z. & YANG, C. 2016. Fine mapping of the  
424 *dialytic* gene that controls multicellular trichome formation and stamen development in  
425 tomato. *Theor Appl Genet*, 129, 1531-9.

426 CHANG, J., YU, T., YANG, Q., LI, C., XIONG, C., GAO, S., XIE, Q., ZHENG, F., LI, H., TIAN, Z., YANG, C. &  
427 YE, Z. 2018. Hair, encoding a single C2H2 zinc-finger protein, regulates multicellular trichome  
428 formation in tomato. *The Plant Journal*, 0.

429 CHATER, C. C. C., CAINE, R. S., FLEMING, A. J. & GRAY, J. E. 2017. Origins and evolution of stomatal  
430 development. *Plant Physiol*, 174, 624-38.

431 CHITWOOD, D. H., KUMAR, R., HEADLAND, L. R., RANJAN, A., COVINGTON, M. F., ICHIHASHI, Y.,  
432 FULOP, D., JIMENEZ-GOMEZ, J. M., PENG, J., MALOOF, J. N. & SINHA, N. R. 2013. A  
433 quantitative genetic basis for leaf morphology in a set of precisely defined tomato  
434 introgression lines. *Plant Cell*, 25, 2465-2481.

435 ESHED, Y. & ZAMIR, D. 1995. An introgression line population of *Lycopersicon pennellii* in the  
436 cultivated tomato enables the identification and fine mapping of yield-associated QTL.  
437 *Genetics*, 141, 1147-62.

438 EWAS, M., GAO, Y., WANG, S., LIU, X., ZHANG, H., NISHAWY, E. M. E., ALI, F., SHAHZAD, R., ZIAF, K.,  
439 SUBTHAIN, H., MARTIN, C. & LUO, J. 2016. Manipulation of SIMX1 for enhanced carotenoids  
440 accumulation and drought resistance in tomato. *Science Bulletin*, 61, 1413-1418.

441 FRARY, A., KELES, D., PINAR, H., GOL, D. & DOGANLAR, S. 2011. NaCl tolerance in *Lycopersicon*  
442 *pennellii* introgression lines: QTL related to physiological responses. *Biologia Plantarum*, 55,  
443 461-468.

444 GALDON-ARMERO, J., FULLANA-PERICAS, M., MULET, P. A., CONESA, M. A., MARTIN, C. & GALMES, J.  
445 2018. The ratio of trichomes to stomata is associated with water use efficiency in *Solanum*  
446 *lycopersicum* (tomato). *Plant J*, 96, 607-619.

447 GAN, Y., KUMIMOTO, R., LIU, C., RATCLIFFE, O., YU, H. & BROUN, P. 2006. *GLABROUS*  
448 *INFLORESCENCE STEMS* modulates the regulation by gibberellins of epidermal differentiation  
449 and shoot maturation in *Arabidopsis*. *The Plant Cell*, 18, 1383-1395.

450 GAN, Y., LIU, C., YU, H. & BROUN, P. 2007. Integration of cytokinin and gibberellin signalling by  
451 *Arabidopsis* transcription factors GIS, ZFP8 and GIS2 in the regulation of epidermal cell fate.  
452 *Development*, 134, 2073-81.

453 GAO, S., GAO, Y., XIONG, C., YU, G., CHANG, J., YANG, Q., YANG, C. & YE, Z. 2017. The tomato B-type  
454 cyclin gene, SICycB2, plays key roles in reproductive organ development, trichome initiation,  
455 terpenoids biosynthesis and *Prodenia litura* defense. *Plant Sci*, 262, 103-114.

456 GLOVER, B. J. 2000. Differentiation in plant epidermal cells. *Journal of Experimental Botany*, 51, 497-  
457 505.

458 GLOVER, B. J., PEREZ-RODRIGUEZ, M. & MARTIN, C. 1998. Development of several epidermal cell  
459 types can be specified by the same MYB-related plant transcription factor. *Development*,  
460 125, 3497-508.

461 GOLEY, E. D. & WELCH, M. D. 2006. The ARP2/3 complex: an actin nucleator comes of age. *Nat Rev*  
462 *Mol Cell Biol*, 7, 713-26.

463 HAUSER, M. T. 2014. Molecular basis of natural variation and environmental control of trichome  
464 patterning. *Front Plant Sci*, 5, 320.

465 HEICHEL, G. H. & ANAGNOSTAKIS, S. L. 1978a. Stomatal response to light of *Solanum pennellii*,  
466 *Lycopersicon esculentum*, and a graft-induced chimera. *Plant Physiology*, 62, 387-390.

467 HEICHEL, G. H. & ANAGNOSTAKIS, S. L. 1978b. Stomatal Response to Light of *Solanum pennellii*,  
468 *Lycopersicon esculentum*, and a Graft-induced Chimera. *Plant Physiol*, 62, 387-90.

469 HETHERINGTON, A. M. & WOODWARD, F. I. 2003. The role of stomata in sensing and driving  
470 environmental change. *Nature*, 424, 901-8.

- 471 JEONG, N.-R., KIM, H., HWANG, I.-T., HOWE, G. A. & KANG, J.-H. 2017. Genetic analysis of the tomato  
472 *inquieta* mutant links the ARP2/3 complex to trichome development. *Journal of Plant*  
473 *Biology*, 60, 582-592.
- 474 KANG, J.-H., LIU, G., SHI, F., JONES, A. D., BEAUDRY, R. M. & HOWE, G. A. 2010. The tomato odorless-  
475 2 mutant is defective in trichome-based production of diverse specialized metabolites and  
476 broad-spectrum resistance to insect herbivores. *Plant physiology*, 154, 262-272.
- 477 KANG, J. H., CAMPOS, M. L., ZEMELIS-DURFEE, S., AL-HADDAD, J. M., JONES, A. D., TELEWSKI, F. W.,  
478 BRANDIZZI, F. & HOWE, G. A. 2016. Molecular cloning of the tomato Hairless gene implicates  
479 actin dynamics in trichome-mediated defense and mechanical properties of stem tissue. *J*  
480 *Exp Bot*, 67, 5313-24.
- 481 KIRIK, V., LEE, M. M., WESTER, K., HERRMANN, U., ZHENG, Z., OPPENHEIMER, D., SCHIEFELBEIN, J. &  
482 HULSKAMP, M. 2005. Functional diversification of MYB23 and GL1 genes in trichome  
483 morphogenesis and initiation. *Development*, 132, 1477-1485.
- 484 KIRIK, V., SIMON, M., HUELKAMP, M. & SCHIEFELBEIN, J. 2004a. The ENHANCER OF TRY AND CPC1  
485 gene acts redundantly with TRIPTYCHON and CAPRICE in trichome and root hair cell  
486 patterning in Arabidopsis. *Dev Biol*, 268, 506-13.
- 487 KIRIK, V., SIMON, M., WESTER, K., SCHIEFELBEIN, J. & HULSKAMP, M. 2004b. ENHANCER of TRY and  
488 CPC 2 (ETC2) reveals redundancy in the region-specific control of trichome development of  
489 Arabidopsis. *Plant Mol Biol*, 55, 389-98.
- 490 LARKIN, J. C., OPPENHEIMER, D. G., LLOYD, A. M., PAPAROZZI, E. T. & MARKS, M. D. 1994. Roles of  
491 the GLABROUS1 and TRANSPARENT TESTA GLABRA genes in Arabidopsis trichome  
492 development. *Plant Cell*, 6, 1065-76.
- 493 LI, L., ZHAO, Y., MCCAIG, B. C., WINGERD, B. A., WANG, J., WHALON, M. E., PICHERSKY, E. & HOWE,  
494 G. A. 2004. The Tomato Homolog of CORONATINE-INSENSITIVE1 Is Required for the  
495 Maternal Control of Seed Maturation, Jasmonate-Signaled Defense Responses, and  
496 Glandular Trichome Development. *Plant Cell*, 16, 126-43.
- 497 LIANG, G., HE, H., LI, Y., AI, Q. & YU, D. 2014. MYB82 functions in regulation of trichome  
498 development in Arabidopsis. *Journal of Experimental Botany*, 65, 3215-3223.
- 499 LUCKWILL, L. 1943. The genus *Lycopersicon*; an historical, biological, and taxonomic survey of the  
500 wild and cultivated tomatoes. *Aberdeen, The University Press*.
- 501 MAES, L., INZE, D. & GOOSSENS, A. 2008. Functional specialization of the TRANSPARENT TESTA  
502 GLABRA1 network allows differential hormonal control of laminal and marginal trichome  
503 initiation in Arabidopsis rosette leaves. *Plant Physiol*, 148, 1453-64.
- 504 MAGNUM, O. S. F., GABRIEL, L., SALEH, A., LAISE, R. S., MARIANA, C., FUENTES, S. V., SILVESTRE, L. B.,  
505 DIMITRIOS, F., BJÖRN, U., LOPES, B. L., M., D. F., RONAN, S., L., A. W., MAGDALENA, R.,  
506 NATHALIA, S., R., F. A., FERNANDO, C. & ADRIANO, N. N. 2018. The genetic architecture of  
507 photosynthesis and plant growth-related traits in tomato. *Plant, Cell & Environment*, 41,  
508 327-341.
- 509 MCDOWELL, E. T., KAPTEYN, J., SCHMIDT, A., LI, C., KANG, J. H., DESCOUR, A., SHI, F., LARSON, M.,  
510 SCHILMILLER, A., AN, L., JONES, A. D., PICHERSKY, E., SODERLUND, C. A. & GANG, D. R. 2011.  
511 Comparative functional genomic analysis of Solanum glandular trichome types. *Plant Physiol*,  
512 155, 524-39.
- 513 NADAKUDUTI, S. S., POLLARD, M., KOSMA, D. K., ALLEN, C., OHLROGGE, J. B. & BARRY, C. S. 2012.  
514 Pleiotropic phenotypes of the sticky peel mutant provide new insight into the role of CUTIN  
515 DEFICIENT2 in epidermal cell function in tomato. *Plant Physiology*, 159, 945-960.
- 516 PATTANAIK, S., PATRA, B., SINGH, S. K. & YUAN, L. 2014. An overview of the gene regulatory network  
517 controlling trichome development in the model plant, Arabidopsis. *Frontiers in Plant Science*,  
518 5.
- 519 PAYNE, C. T., ZHANG, F. & LLOYD, A. M. 2000. GL3 encodes a bHLH protein that regulates trichome  
520 development in arabidopsis through interaction with GL1 and TTG1. *Genetics*, 156, 1349-62.

- 521 PAYNE, T., CLEMENT, J., ARNOLD, D. & LLOYD, A. 1999. Heterologous myb genes distinct from GL1  
522 enhance trichome production when overexpressed in *Nicotiana tabacum*. *Development*, 126,  
523 671-682.
- 524 PAYNE, W. W. 1978. A glossary of plant hair terminology. *Brittonia*, 30, 239-255.
- 525 PLETT, J. M., WILKINS, O., CAMPBELL, M. M., RALPH, S. G. & REGAN, S. 2010. Endogenous  
526 overexpression of *Populus* MYB186 increases trichome density, improves insect pest  
527 resistance, and impacts plant growth. *Plant J*, 64, 419-32.
- 528 RICK, C. M. & CHETELAT, R. T. Year. Utilization of related wild species for tomato improvement. *In*,  
529 1995. International Society for Horticultural Science (ISHS), Leuven, Belgium, 21-38.
- 530 RIGANO, M. M., ARENA, C., DI MATTEO, A., SERENO, S., FRUSCIANTE, L. & BARONE, A. 2014. *Eco-*  
531 *physiological response to water stress of drought-tolerant and drought-sensitive tomato*  
532 *genotypes*.
- 533 RON, M., DORRITY, M. W., DE LUCAS, M., TOAL, T., HERNANDEZ, R. I., LITTLE, S. A., MALOOF, J. N.,  
534 KLIEBENSTEIN, D. J. & BRADY, S. M. 2013. Identification of novel loci regulating interspecific  
535 variation in root morphology and cellular development in tomato. *Plant Physiology*, 162,  
536 755-768.
- 537 SCHILLMILLER, A. L., LAST, R. L. & PICHERSKY, E. 2008. Harnessing plant trichome biochemistry for the  
538 production of useful compounds. *Plant Journal*, 54, 702-711.
- 539 SCHNITTGER, A., FOLKERS, U., SCHWAB, B., JURGENS, G. & HULSKAMP, M. 1999. Generation of a  
540 spacing pattern: the role of triptychon in trichome patterning in *Arabidopsis*. *Plant Cell*, 11,  
541 1105-16.
- 542 SCHNITTGER, A., JURGENS, G. & HULSKAMP, M. 1998. Tissue layer and organ specificity of trichome  
543 formation are regulated by GLABRA1 and TRIPTYCHON in *Arabidopsis*. *Development*, 125,  
544 2283-9.
- 545 SERNA, L. & MARTIN, C. 2006. Trichomes: different regulatory networks lead to convergent  
546 structures. *Trends in Plant Science*, 11, 274-280.
- 547 SHARLACH, M., DAHLBECK, D., LIU, L., CHIU, J., JIMENEZ-GOMEZ, J. M., KIMURA, S., KOENIG, D.,  
548 MALOOF, J. N., SINHA, N., MINSAVAGE, G. V., JONES, J. B., STALL, R. E. & STASKAWICZ, B. J.  
549 2013. Fine genetic mapping of RXopJ4, a bacterial spot disease resistance locus from  
550 *Solanum pennellii* LA716. *Theor Appl Genet*, 126, 601-9.
- 551 SIMMONS, A. T. & GURR, G. M. 2005. Trichomes of *Lycopersicon* species and their hybrids: effects  
552 on pests and natural enemies. *Agricultural and Forest Entomology*, 7, 265-276.
- 553 SMART, C. D., TANKSLEY, S. D., MAYTON, H. & FRY, W. E. 2007. Resistance to *Phytophthora infestans*  
554 in *Lycopersicon pennellii*. *Plant Disease*, 91, 1045-1049.
- 555 SUN, L., ZHANG, A., ZHOU, Z., ZHAO, Y., YAN, A., BAO, S., YU, H. & GAN, Y. 2015. GLABROUS  
556 INFLORESCENCE STEMS3 (GIS3) regulates trichome initiation and development in  
557 *Arabidopsis*. *New Phytologist*, 206, 220-230.
- 558 SZYMANSKI, D. B., JILK, R. A., POLLOCK, S. M. & MARKS, M. D. 1998. Control of GL2 expression in  
559 *Arabidopsis* leaves and trichomes. *Development*, 125, 1161-1171.
- 560 TIAN, N., LIU, F., WANG, P., ZHANG, X., LI, X. & WU, G. 2017. The molecular basis of glandular  
561 trichome development and secondary metabolism in plants. *Plant Gene*, 12, 1-12.
- 562 TOMINAGA-WADA, R., NUKUMIZU, Y., SATO, S. & WADA, T. 2013. Control of Plant Trichome and  
563 Root-Hair Development by a Tomato (*Solanum lycopersicum*) R3 MYB Transcription Factor.  
564 *PLoS ONE*, 8, e54019.
- 565 VENDEMIATTI, E., ZSOGON, A., SILVA, G., DE JESUS, F. A., CUTRI, L., FIGUEIREDO, C. R. F., TANAKA, F.  
566 A. O., NOGUEIRA, F. T. S. & PERES, L. E. P. 2017. Loss of type-IV glandular trichomes is a  
567 heterochronic trait in tomato and can be reverted by promoting juvenility. *Plant Sci*, 259, 35-  
568 47.
- 569 VÓFÉLY, R. V., GALLAGHER, J., PISANO, G. D., BARTLETT, M. & BRAYBROOK, S. A. 2019. Of puzzles  
570 and pavements: a quantitative exploration of leaf epidermal cell shape. *New Phytologist*,  
571 221, 540-552.

- 572 WADA, T., TACHIBANA, T., SHIMURA, Y. & OKADA, K. 1997. Epidermal cell differentiation in  
573 Arabidopsis determined by a Myb homolog, CPC. *Science*, 277, 1113-6.
- 574 WALKER, A. R., DAVISON, P. A., BOLOGNESI-WINFIELD, A. C., JAMES, C. M., SRINIVASAN, N.,  
575 BLUNDELL, T. L., ESCH, J. J., MARKS, M. D. & GRAY, J. C. 1999. The TRANSPARENT TESTA  
576 GLABRA1 locus, which regulates trichome differentiation and anthocyanin biosynthesis in  
577 Arabidopsis, encodes a WD40 repeat protein. *Plant Cell*, 11, 1337-50.
- 578 WESTER, K., DIGIUNI, S., GEIER, F., TIMMER, J., FLECK, C. & HULSKAMP, M. 2009. Functional diversity  
579 of R3 single-repeat genes in trichome development. *Development*, 136, 1487-96.
- 580 WU, H., TIAN, Y., WAN, Q., FANG, L., GUAN, X., CHEN, J., HU, Y., YE, W., ZHANG, H., GUO, W., CHEN,  
581 X. & ZHANG, T. 2018. Genetics and evolution of MIXTA genes regulating cotton lint fiber  
582 development. *New Phytol*, 217, 883-895.
- 583 YAN, T., LI, L., XIE, L., CHEN, M., SHEN, Q., PAN, Q., FU, X., SHI, P., TANG, Y., HUANG, H., HUANG, Y.,  
584 HUANG, Y. & TANG, K. 2018. A novel HD-ZIP IV/MIXTA complex promotes glandular trichome  
585 initiation and cuticle development in *Artemisia annua*. *New Phytologist*, 218, 567-578.
- 586 YANG, C., LI, H., ZHANG, J., LUO, Z., GONG, P., ZHANG, C., LI, J., WANG, T., ZHANG, Y., LU, Y. E. & YE,  
587 Z. 2011. A regulatory gene induces trichome formation and embryo lethality in tomato.  
588 *Proceedings of the National Academy of Sciences*, 108, 11836-11841.
- 589 ZHANG, F., GONZALEZ, A., ZHAO, M., PAYNE, C. T. & LLOYD, A. 2003. A network of redundant bHLH  
590 proteins functions in all TTG1-dependent pathways of Arabidopsis. *Development*, 130, 4859-  
591 69.
- 592 ZHANG, X., YAN, F., TANG, Y., YUAN, Y., DENG, W. & LI, Z. 2015. Auxin Response Gene SIARF3 Plays  
593 Multiple Roles in Tomato Development and is Involved in the Formation of Epidermal Cells  
594 and Trichomes. *Plant and Cell Physiology*, 56, 2110-2124.
- 595 ZHOU, Z., AN, L., SUN, L., ZHU, S., XI, W., BROUN, P., YU, H. & GAN, Y. 2011. Zinc finger protein5 is  
596 required for the control of trichome initiation by acting upstream of zinc finger protein8 in  
597 Arabidopsis. *Plant Physiol*, 157, 673-82.
- 598 ZHOU, Z., SUN, L., ZHAO, Y., AN, L., YAN, A., MENG, X. & GAN, Y. 2013. Zinc Finger Protein 6 (ZFP6)  
599 regulates trichome initiation by integrating gibberellin and cytokinin signaling in Arabidopsis  
600 thaliana. *New Phytol*, 198, 699-708.

601

602
